# Supplementary material for: “It Comes in Steps and Stages”: Experiences of People Living with HIV in Achieving Employment
Source: MDPI journal article supplement (doi:10.3390/ijerph20186778), 2023-09-18
Supplement: s1 [file s1]

### **Supplementary Table 1: Question guide for Clients in HRSA/SPNS Housing & Employment Project**

*Question: Please describe what has helped you with finding employment and/or job training in the [Program Name] program?*

1. Can you tell me about your current employment situation?  
PROBE: Are you currently working or do you expect to work soon?  
PROBE: What type of job or job training are you doing?
2. What was it like working with [Interventionist Name] in getting a job/job training?  
PROBE: What were some of the most helpful things?
3. What was different about your experience working with [Interventionist Name] compared to your previous experiences looking for a job/job training?
4. What made you want to find a job/job training?  
PROBE: Is there anything about the [Program Name] program that encouraged you to find a job/job training?
5. What other supports did you have to help you find a job/job training?  
PROBE: Did any family or friends help you?  
PROBE: Were there other resources or community programs/groups that helped you?  
PROBE: Was there anything about the physical area or your local neighborhood that was a support to you?
6. Did getting a job/job training affect your housing or encourage you to look for new housing?  
IF YES: Can you tell me about that?
